# Supplementary material
Source: Springer Nature journal article supplement (https://www.springermedizin.de/resource/supplementary/13063_2010_473_MOESM1_ESM.pdf/9618294)
Supplement: MOESM1 [file 9618294]

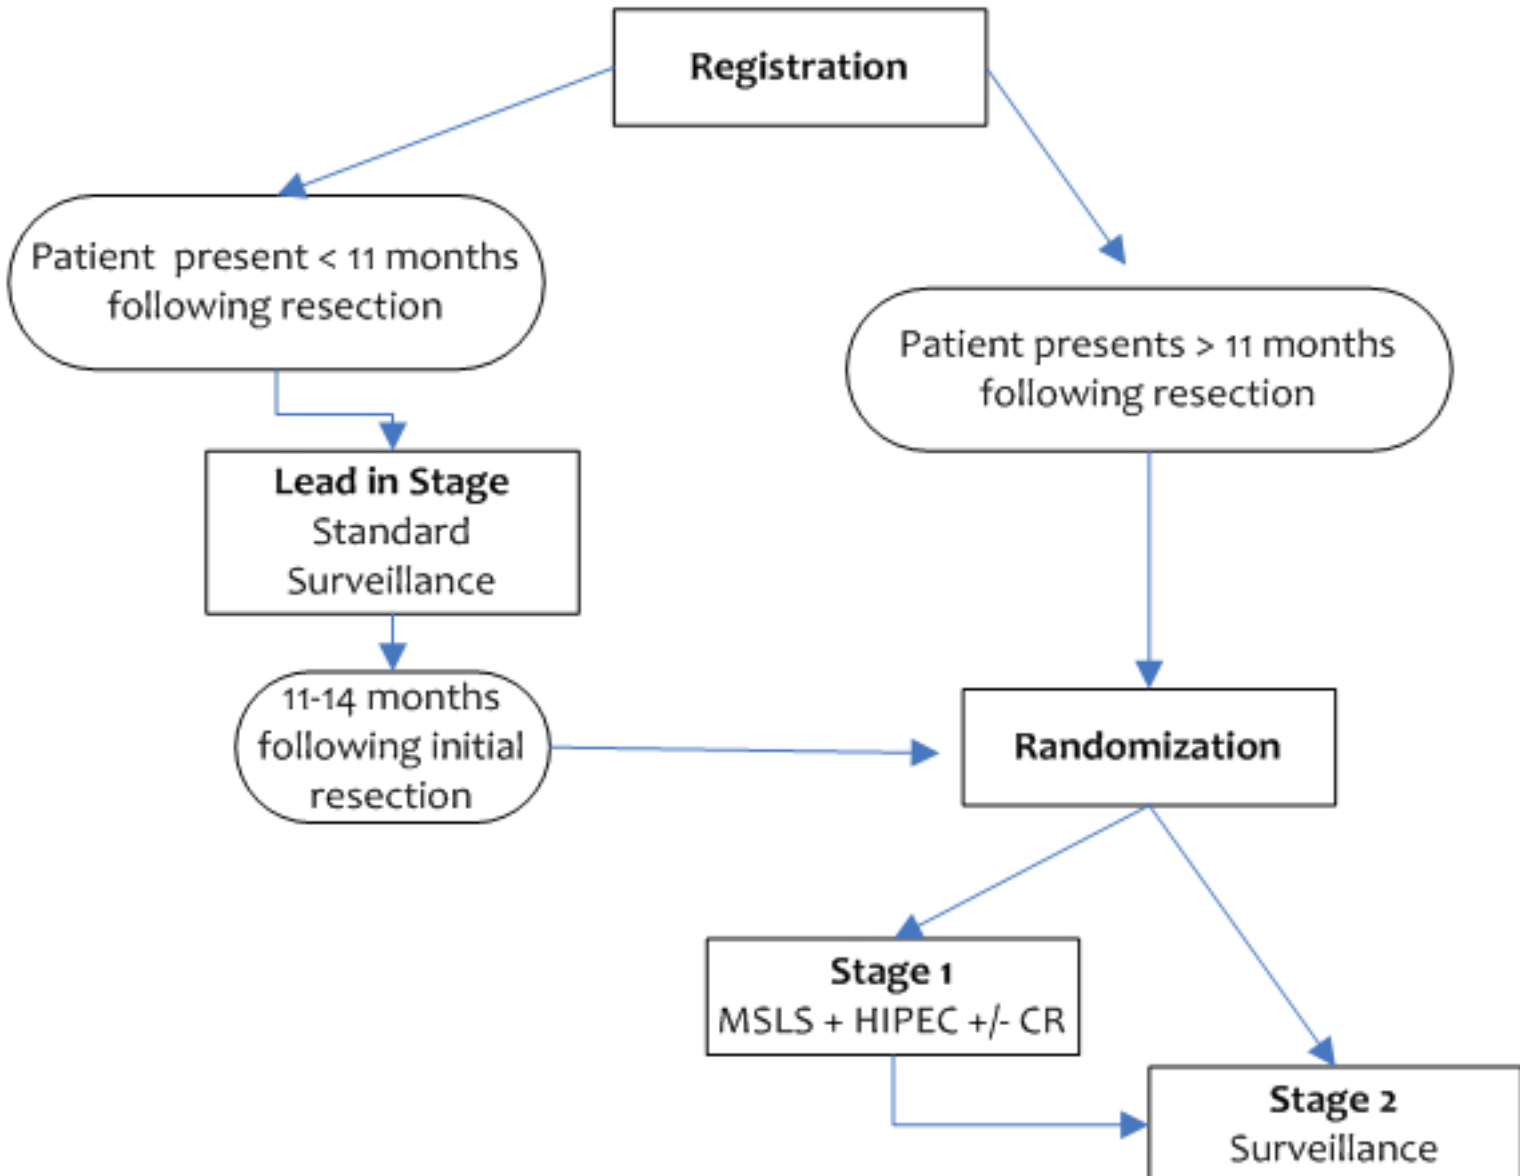

**Registration**

Patient present < 11 months following resection

Patient presents > 11 months following resection

**Lead in Stage**  
Standard Surveillance

11-14 months following initial resection

**Randomization**

**Stage 1**  
MSLS + HIPEC +/- CR

**Stage 2**  
Surveillance
